# Supplementary material
Source: Springer Nature journal article supplement (https://www.springermedizin.de/resource/supplementary/12872_2014_789_MOESM1_ESM.pdf/9430500)

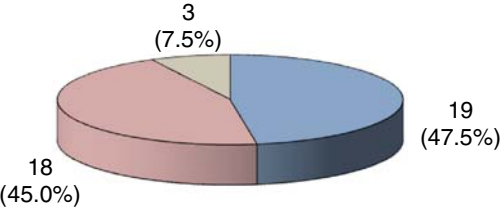

- Autopsy done
- No autopsy
- Autopsy unknown

Supplement: MOESM1 [file 9430500]
